# Supplementary material for: Amyloid β1–42 Oligomers Induce Galectin–1S8 O–GlcNAcylation Leading to Microglia Migration
Source: MDPI journal article supplement (doi:10.3390/cells12141876), 2023-07-17
Supplement: s1 [file s1]

## Supplementary data

**Table S1. O-GlcNAcylated proteins exclusively identified in the A $\beta$ <sub>1-42</sub> oligomers-stimulated microglia.**

| UniProt KB Reference                                      | Identified Protein                            | Gene          |
|-----------------------------------------------------------|-----------------------------------------------|---------------|
| <b>Q13885;Q9BVA1</b>                                      | Tubulin beta-2A chain; Tubulin beta-2B chain  | TBB2A; TBB2B  |
| <b>Q16576; Q16576-2</b>                                   | Histone-binding protein RBBP7                 | RBBP7         |
| <b>Q8IW75</b>                                             | Serpin A12                                    | SERPINA12     |
| <b>P14618; P14618-3; P14618-2</b>                         | Pyruvate kinase PKM                           | PKM           |
| <b>P14625</b>                                             | Endoplasmic                                   | HSP90B1       |
| <b>P60842-2; P60842; Q14240; Q14240-2</b>                 | Eukaryotic initiation factor 4A-I             | EIF4A1        |
| <b>Q12907</b>                                             | Vesicular integral-membrane protein VIP36     | LMAN2         |
| <b>O15118;O15118-2</b>                                    | Niemann-Pick C1 protein                       | NPC1          |
| <b>P09382</b>                                             | Galectin-1                                    | LGALS1        |
| <b>P17050</b>                                             | Alpha-N-acetylgalactosaminidase               | NAGA          |
| <b>P43121; P43121-2</b>                                   | Cell surface glycoprotein MUC18               | MCAM          |
| <b>P52272-2; P52272</b>                                   | Heterogeneous nuclear ribonucleoprotein M     | HNRNPM        |
| <b>P60174-1; P60174; P60174-4</b>                         | Triosephosphate isomerase                     | TPI1          |
| <b>Q13867</b>                                             | Bleomycin hydrolase                           | BLMH          |
| <b>Q6EMK4</b>                                             | Vasorin                                       | VASN          |
| <b>Q6P4E1-2; Q6P4E1-5; Q6P4E1; Q6P4E1-4; Q6P4E1-3</b>     | Protein CASC4                                 | CASC4         |
| <b>Q6ZRP7</b>                                             | Sulfhydryl oxidase 2                          | QSOX2         |
| <b>Q71U36-2; Q71U36; P0DPH8; P0DPH7; Q6PEY2; P0DPH7-2</b> | Tubulin alpha-1A chain;Tubulin alpha-3E chain | TUBA1A;TUBA3E |
| <b>Q96KR1</b>                                             | Zinc finger RNA-binding protein               | ZFR           |
| <b>Q9H0E3; Q9H0E3-3; Q9H0E3-2</b>                         | Histone deacetylase complex subunit SAP130    | SAP130        |
| <b>O43813</b>                                             | LanC-like protein 1                           | LANCL1        |
| <b>P30041</b>                                             | Peroxiredoxin-6                               | PRDX6         |

|                                                                                                                                   |                                                                                                                  |                  |
|-----------------------------------------------------------------------------------------------------------------------------------|------------------------------------------------------------------------------------------------------------------|------------------|
| <b>P10909-3; P10909-4; P10909; P10909-5; P10909-2</b>                                                                             | Clusterin; Clusterin beta chain; Clusterin alpha chain                                                           | CLU              |
| <b>P15289-2; P15289</b>                                                                                                           | Arylsulfatase A; Arylsulfatase A component B; Arylsulfatase A component C                                        | ARSA             |
| <b>Q5TFQ8; P78324-4; P78324; P78324-2</b>                                                                                         | Signal-regulatory protein beta-1 isoform 3; Tyrosine-protein phosphatase non-receptor type substrate 1           | SIRPB1;SIRPA     |
| <b>Q92484-2; Q92484</b>                                                                                                           | Acid sphingomyelinase-like phosphodiesterase 3a                                                                  | SMPDL3A          |
| <b>Q92796</b>                                                                                                                     | Disks large homolog 3                                                                                            | DLG3             |
| <b>Q96JA1-2; Q96JA1</b>                                                                                                           | Leucine-rich repeats and immunoglobulin-like domains protein 1                                                   | LRIG1            |
| <b>P30101</b>                                                                                                                     | Protein disulfide-isomerase A3                                                                                   | PDIA3            |
| <b>P61224-2; P61224-4; P61224-3; P62834; P61224</b>                                                                               | Ras-related protein Rap-1b; Ras-related protein Rap-1A                                                           | RAP1B;RAP1A      |
| <b>P62249</b>                                                                                                                     | 40S ribosomal protein S16                                                                                        | RPS16            |
| <b>Q14697; Q14697-2</b>                                                                                                           | Neutral alpha-glucosidase AB                                                                                     | GANAB            |
| <b>P05141; P12235; Q9H0C2</b>                                                                                                     | ADP/ATP translocase 2; ADP/ATP translocase 2, N-terminally processed; ADP/ATP translocase 1                      | SLC25A5; SLC25A4 |
| <b>P42892-3; P42892-2; P42892-4; P42892</b>                                                                                       | Endothelin-converting enzyme 1                                                                                   | ECE1             |
| <b>P51116; P51114-3; P51114-2; P51114; Q06787-8; Q06787-6; Q06787-2; Q06787-4; Q06787-5; Q06787-9; Q06787-7; Q06787-3; Q06787</b> | Fragile X mental retardation syndrome-related protein 2; Fragile X mental retardation syndrome-related protein 1 | FXR2; FXR1       |
| <b>P67809; P16989-2; P16989-3; Q9Y2T7; P16989</b>                                                                                 | Nuclease-sensitive element-binding protein 1                                                                     | YBX1             |
| <b>Q99623-2; Q99623</b>                                                                                                           | Prohibitin-2                                                                                                     | PHB2             |
| <b>Q9Y2E5-2; Q9Y2E5</b>                                                                                                           | Epididymis-specific alpha-mannosidase                                                                            | MAN2B2           |
| <b>P18124</b>                                                                                                                     | 60S ribosomal protein L7                                                                                         | RPL7             |

|                                                               |                                                           |              |
|---------------------------------------------------------------|-----------------------------------------------------------|--------------|
| <b>P48643-2; P48643</b>                                       | T-complex protein 1 subunit epsilon                       | TCPE         |
| <b>Q15365; P57721-2; P57721-3; P57721-5; P57721-4; P57721</b> | Poly(rC)-binding protein 1;<br>Poly(rC)-binding protein 3 | PCBP1; PCBP3 |
| <b>P33402; P33402-3; P33402-2</b>                             | Guanylate cyclase soluble subunit alpha-2                 | GUCY1A2      |
| <b>Q04118</b>                                                 | Basic salivary proline-rich protein 3                     | PRB3         |
| <b>Q9H6L2-2</b>                                               | Transmembrane protein 231                                 | TMEM231      |
| <b>Q9ULF5</b>                                                 | Zinc transporter ZIP10                                    | SLC39A10     |
